# Supplementary material
Source: Springer Nature journal article supplement (https://www.springermedizin.de/resource/supplementary/12967_2013_1713_MOESM3_ESM.pdf/9575054)

**A**

Probability of relapse-free survival

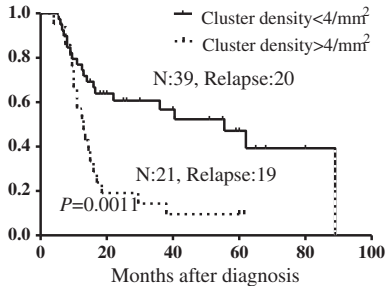**B**

Probability of overall survival

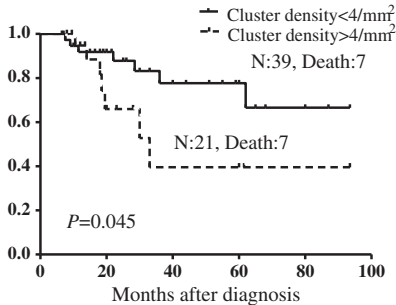

Supplement: MOESM3 [file 9575054]
